# Supplementary material for: The Endometrial Microbiota—16S rRNA Gene Sequence Signatures in Healthy, Pregnant and Endometritis Dairy Cows
Source: MDPI journal article supplement (doi:10.3390/vetsci10030215), 2023-03-10
Supplement: s1 [file s1]

**A**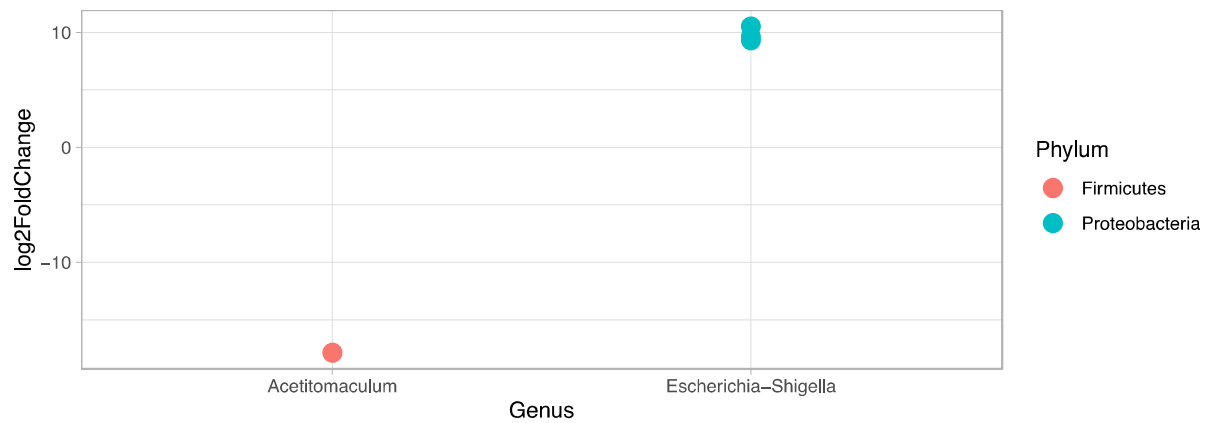**B**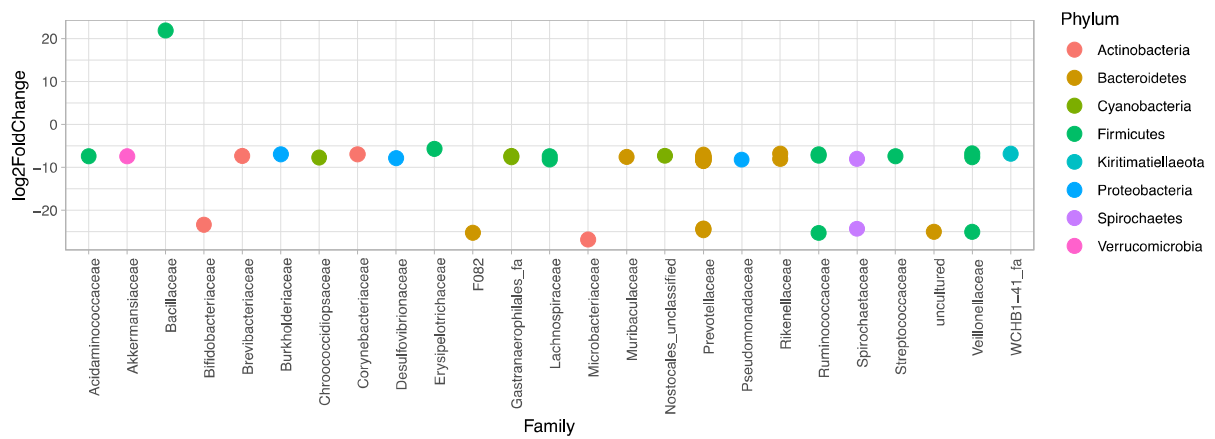

**Figure S1. (A)** DESeq2 analysis with Wald test indicating the fold-change of bacterial genera in uterine bacterial communities of cows diagnosed with endometritis relative to healthy cows ( $P_{adj} < 0.1$ ). A positive fold change implies an increase of abundance in endometritic cows. **(B)** DESeq2 analysis results indicating the fold change of bacterial families in uterine bacterial communities of pregnant cows relative to healthy cows ( $P_{adj} < 0.1$ ). A positive fold change implies an increase of abundance in pregnant cows.
